# Supplementary material for: Functionalized 2D Nb2C nanosheets for primary and recurrent cancer photothermal/immune-therapy in the NIR-II biowindow
Source: Royal Society of Chemistry journal article supplement (doi:10.1039/d1nr05126a), 2021-01-01
Supplement: d1nr05126a1.pdf [file d1nr05126a1.pdf]

*Supporting Information*

**Functionalized 2D Nb<sub>2</sub>C nanosheets for primary and recurrent cancer photothermal/immune-therapy in NIR-II biowindow**

Yao Lu<sup>a</sup>, Xiaoge Zhang<sup>a</sup>, Xiuqi Hou<sup>a</sup>, Miao Feng<sup>a</sup>, Zhong Cao<sup>a</sup>, Jie Liu<sup>a,\*</sup>

<sup>a</sup> *School of Biomedical Engineering, Shenzhen Campus of Sun Yat-sen University, Shenzhen, Guangdong 518107, China*

\*E-mail: [liujie56@mail.sysu.edu.cn](mailto:liujie56@mail.sysu.edu.cn)

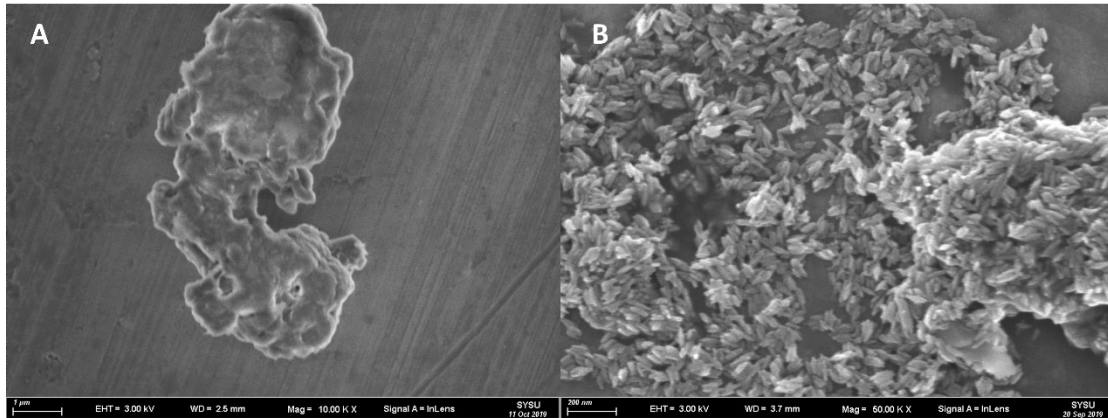

Fig. S1 SEM images of (A) Nb<sub>2</sub>AlC bulk and (B) after etching.

| Sample ID         | Element | Result(mg/L) |
|-------------------|---------|--------------|
| NbAlC             | Al      | 0.126        |
| Nb <sub>2</sub> C | Al      | 0.005        |

Table S1. ICP analysis of Nb<sub>2</sub>AlC and Nb<sub>2</sub>C.

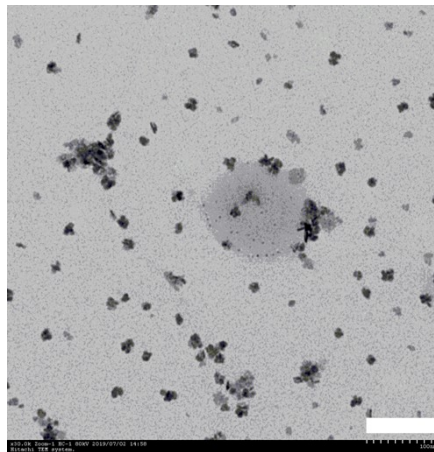

Fig. S2 TEM image of Nb<sub>2</sub>C@PDA-R837@RBC NPs after laser irradiation. (Scale bar = 100 nm)

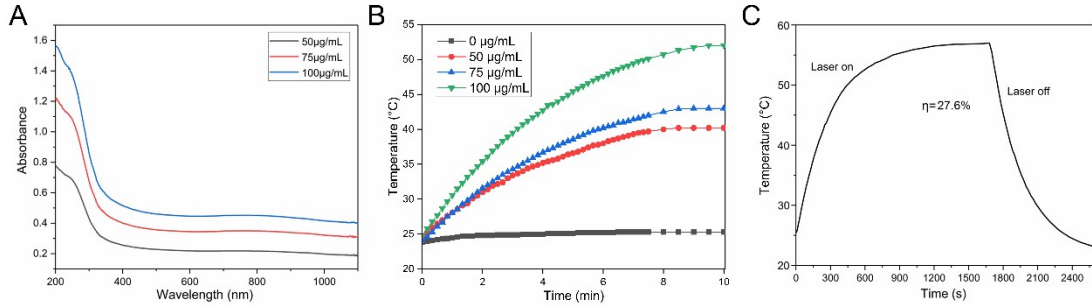

Fig. S3 (A) Vis-NIR absorbance spectra of aqueous suspensions of dispersed Nb<sub>2</sub>C NSs with different concentrations. (B) Heating curves of Nb<sub>2</sub>C NSs at different concentrations. (C) Photothermal conversion efficiency of Nb<sub>2</sub>C@PDA-R837@RBC NPs.

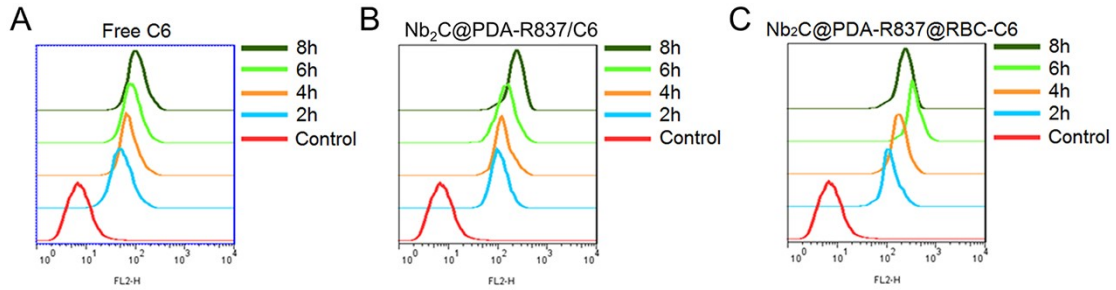

Fig. S4 Flow-cytometry assay of cellular uptake after 4T1 cells incubated with (A) free C6, (B) C6-labeled Nb<sub>2</sub>C@PDA-R837 and (C) Nb<sub>2</sub>C@PDA-R837@RBC for 2h, 4h, 6h and 8h.

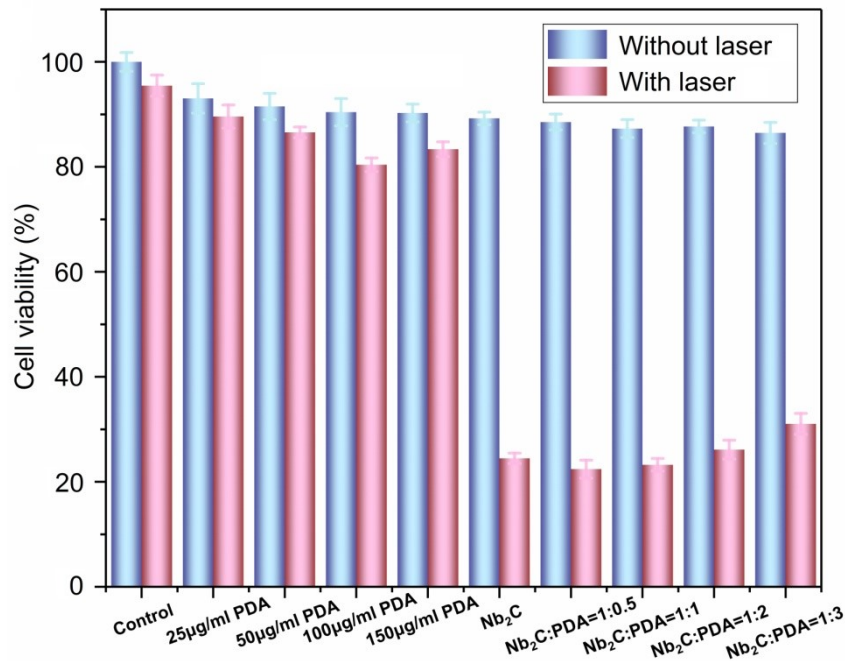

Fig. S5 Cell viability of 4T1 cells after treatments of PDA, Nb<sub>2</sub>C and Nb<sub>2</sub>C@PDA with different PDA contents with or without laser.
